# Supplementary material for: An automated pipeline to generate initial estimates for population pharmacokinetic models
Source: Research Square preprint supplement (doi:10.21203/rs.3.rs-5806446/v1), 2025-01-22
Supplement: Supplementary file 1 [file dd4f90480e3e028b0795fd92.docx]

**An automated pipeline to generate initial estimates for population pharmacokinetic models**

Zhonghui Huang1, Matthew Fidler2, Minshi Lan1, lek Leng Cheng1,4, Frank Kloprogge3, Joseph F Standing1,4

1Great Ormond Street Institute of Child Health, University College London, London, UK

2Novartis Pharmaceuticals Corporation, Fort Worth, Texas, USA

3Institute for Global Health, University College London, London, UK

4Great Ormond Street Hospital for Children, London, UK

**Corresponding author: Zhonghui Huang**

**Affiliation:** Great Ormond Street Institute of Child Health, University College London, London, UK

**E-mail:** [**zhonghui.huang.20@ucl.ac.uk**](mailto:zhonghui.huang.20@ucl.ac.uk)

**Supplementary Figures**

[**Supplementary Figure 1.** Plasma concentration plots for data collected from nlmixr2data package 2](#_Toc187270234)

[**Supplementary Figure 2.** Plasma concentration plots for ten real-life datasets collected from publications 3](#_Toc187270235)

[**Supplementary Figure 3.** Comparison of re-estimated clearance (up) and volume of distribution (bottom) across different strategies of setting initial estimates run by FOCEI 4](#_Toc187270236)

[**Supplementary Figure 4.** Model run time on 13 real-life datasets (SAEM) 5](#_Toc187270237)

[**Supplementary Figure 5.** Model run time on 13 real-life datasets (FOCEI) 6](#_Toc187270238)

**Supplementary Tables**

[**Supplementary Table 1.** Summary of study characteristics of 10 real-life datasets 7](#_Toc187270239)

[**Supplementary Table 2.** Parameter re-estimates of 21 simulated datasets using different initial estimate strategies (SAEM) 8](#_Toc187270240)

[**Supplementary Table 3.** Parameter re-estimates of 21 simulated datasets using different initial estimate strategies (FOCEI) 12](#_Toc187270241)

[**Supplementary Table 4.** Statistics of final parameter estimates within 20% and 30% of original values across five initial estimate strategies in simulated datasets (SAEM) 16](#_Toc187270242)

[**Supplementary Table 5.** Statistics of final parameter estimates within 20% and 30% of original values across five initial estimate strategies in simulated datasets (FOCEI) 17](#_Toc187270243)

[**Supplementary Table 6.** Initial estimates recommended by the pipeline for 13 real-life datasets 18](#_Toc187270244)

[**Supplementary Table 7.** Comparison of parameter estimation results using initial estimates set to 1 vs. pipeline recommendations for one- and two-compartment models (run by SAEM) 19](#_Toc187270245)

**Supplementary Figure 1.** Plasma concentration plots for data collected from nlmixr2data package

**

**

Open circles represent the observed data

**Supplementary Figure 2.** Plasma concentration plots for ten real-life datasets collected from publications

**

**

Open circles represent the observed data

**Supplementary Figure 3.** Comparison of re-estimated clearance (up) and volume of distribution (bottom) across different strategies of setting initial estimates run by FOCEI


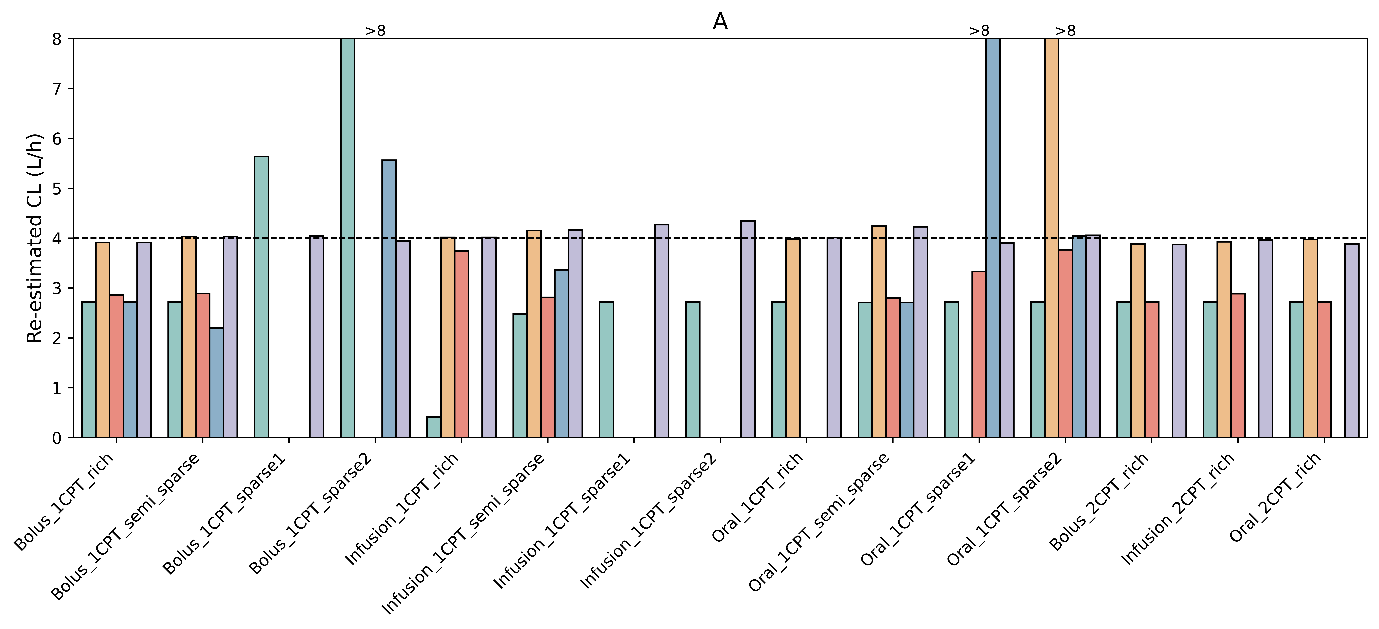

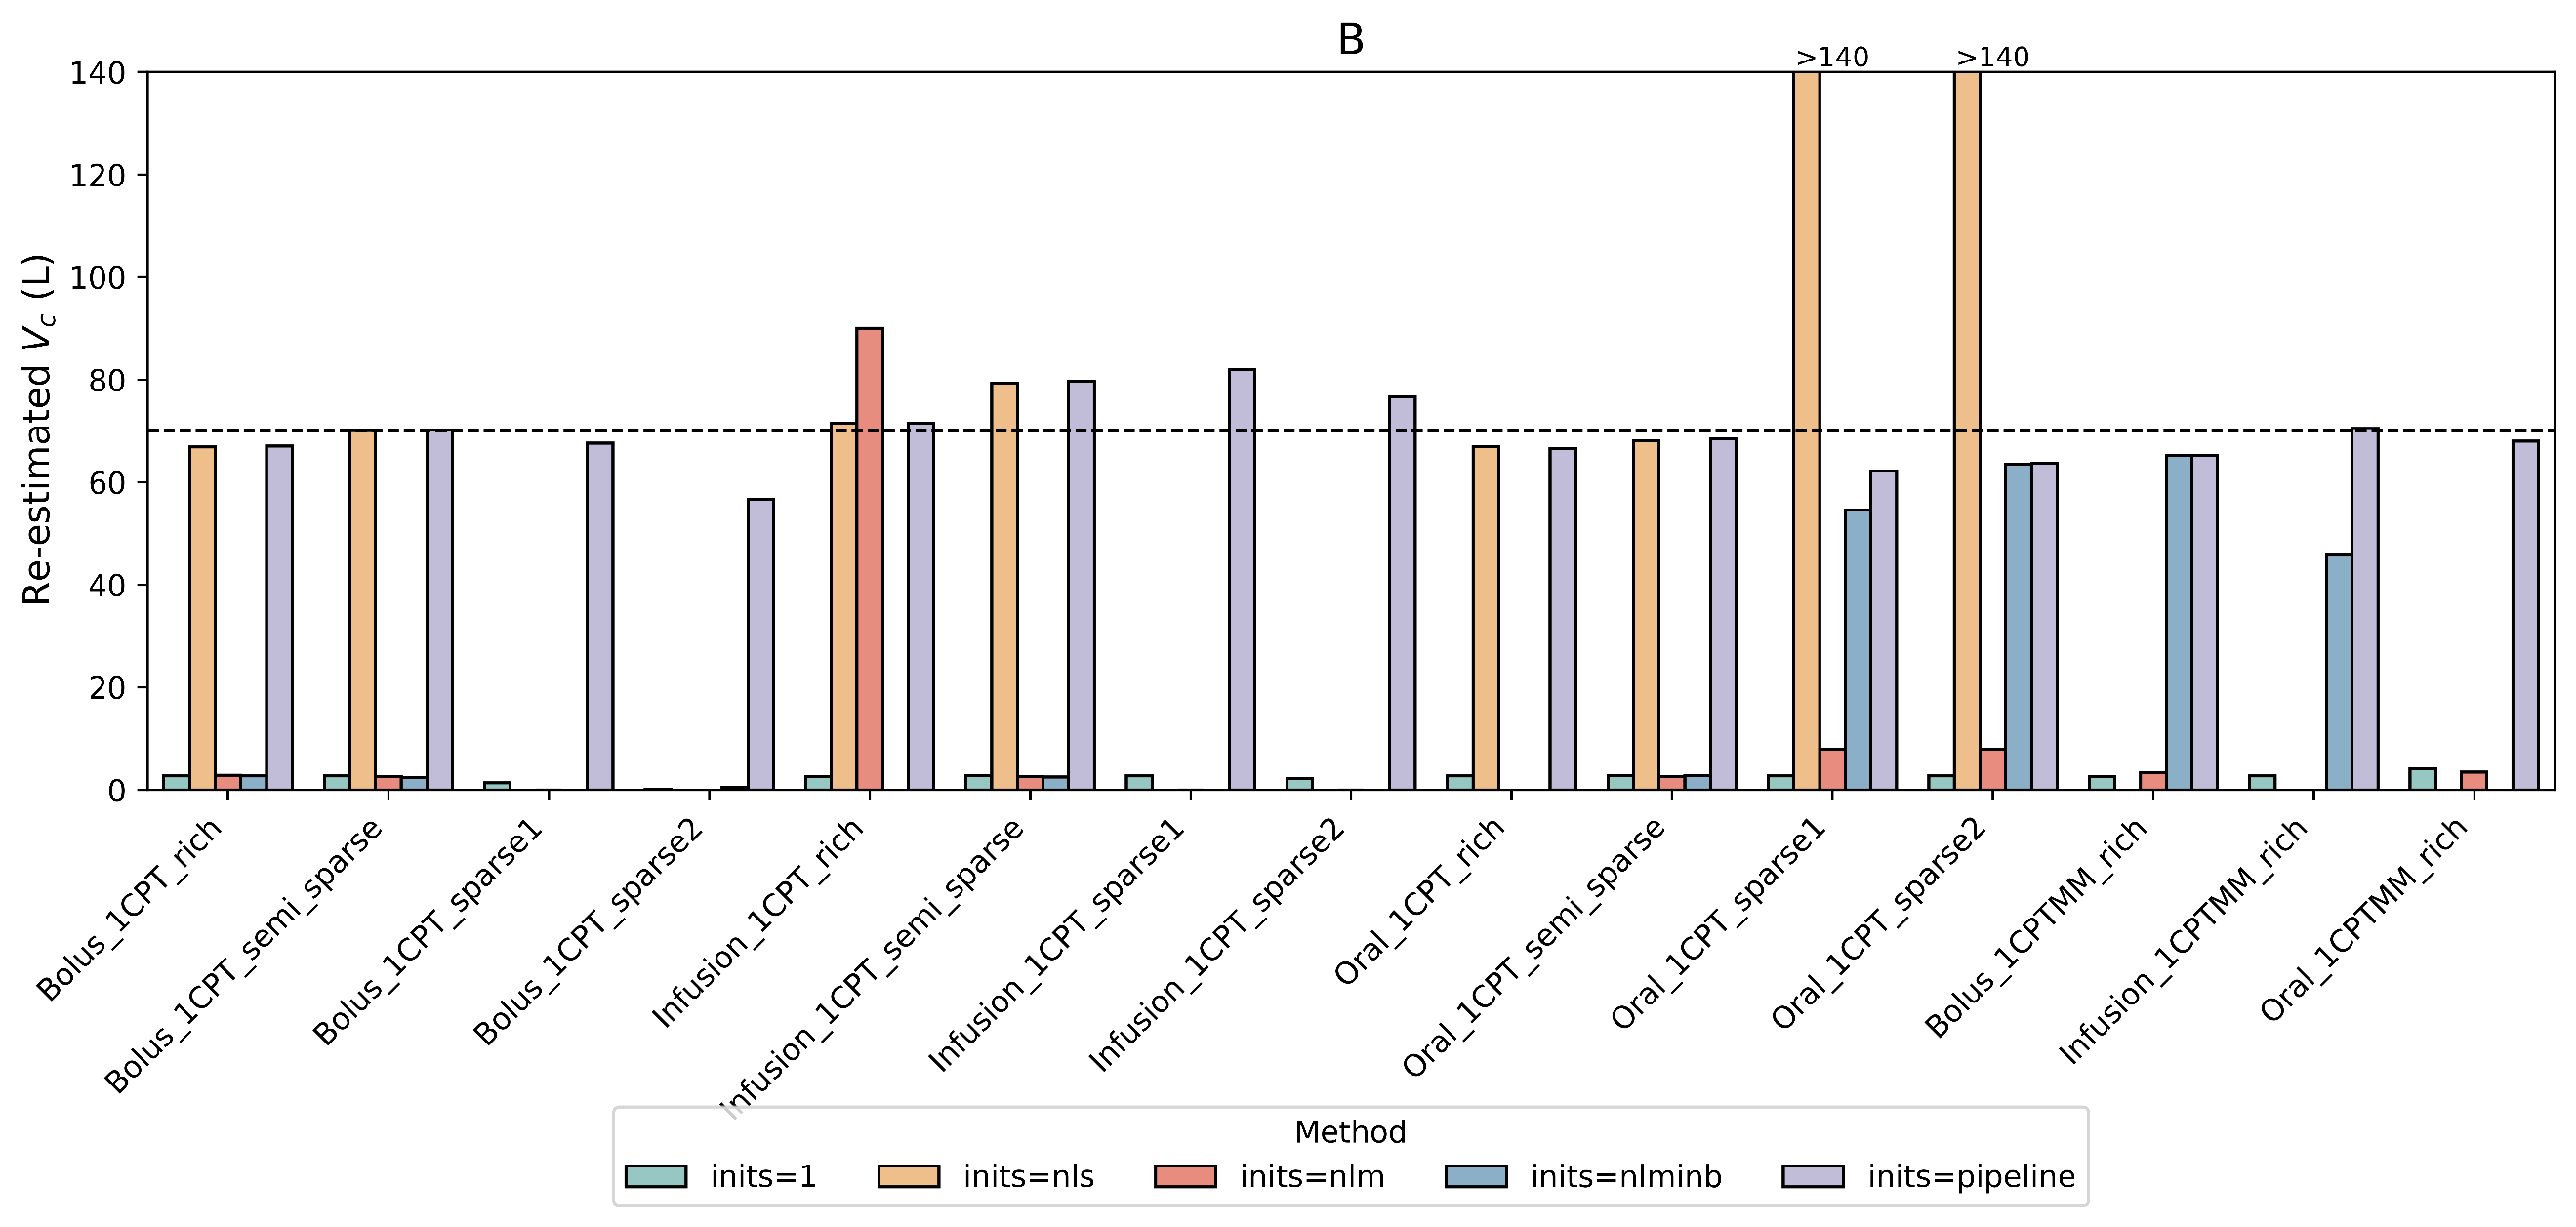


This figure contained re-estimation of clearance and volume of distribution in simulated datasets using five different initial estimate strategies, represented by distinct colors. "inits = 1" sets all initial estimates to 1, while "inits = nls," "inits = nlm," and "inits = nlminb" used parameter estimates from respective algorithms as initial values. "inits = pipeline" referred to pipeline-specific recommendations. To address excessively large initial estimates, the y-axis is capped at 2-fold the original values. Bars exceeding this limit are truncated at the 2-fold value and annotated with ">2-fold" to indicate their magnitude

**Supplementary Figure 4.** Model run time on 13 real-life datasets (SAEM)

**
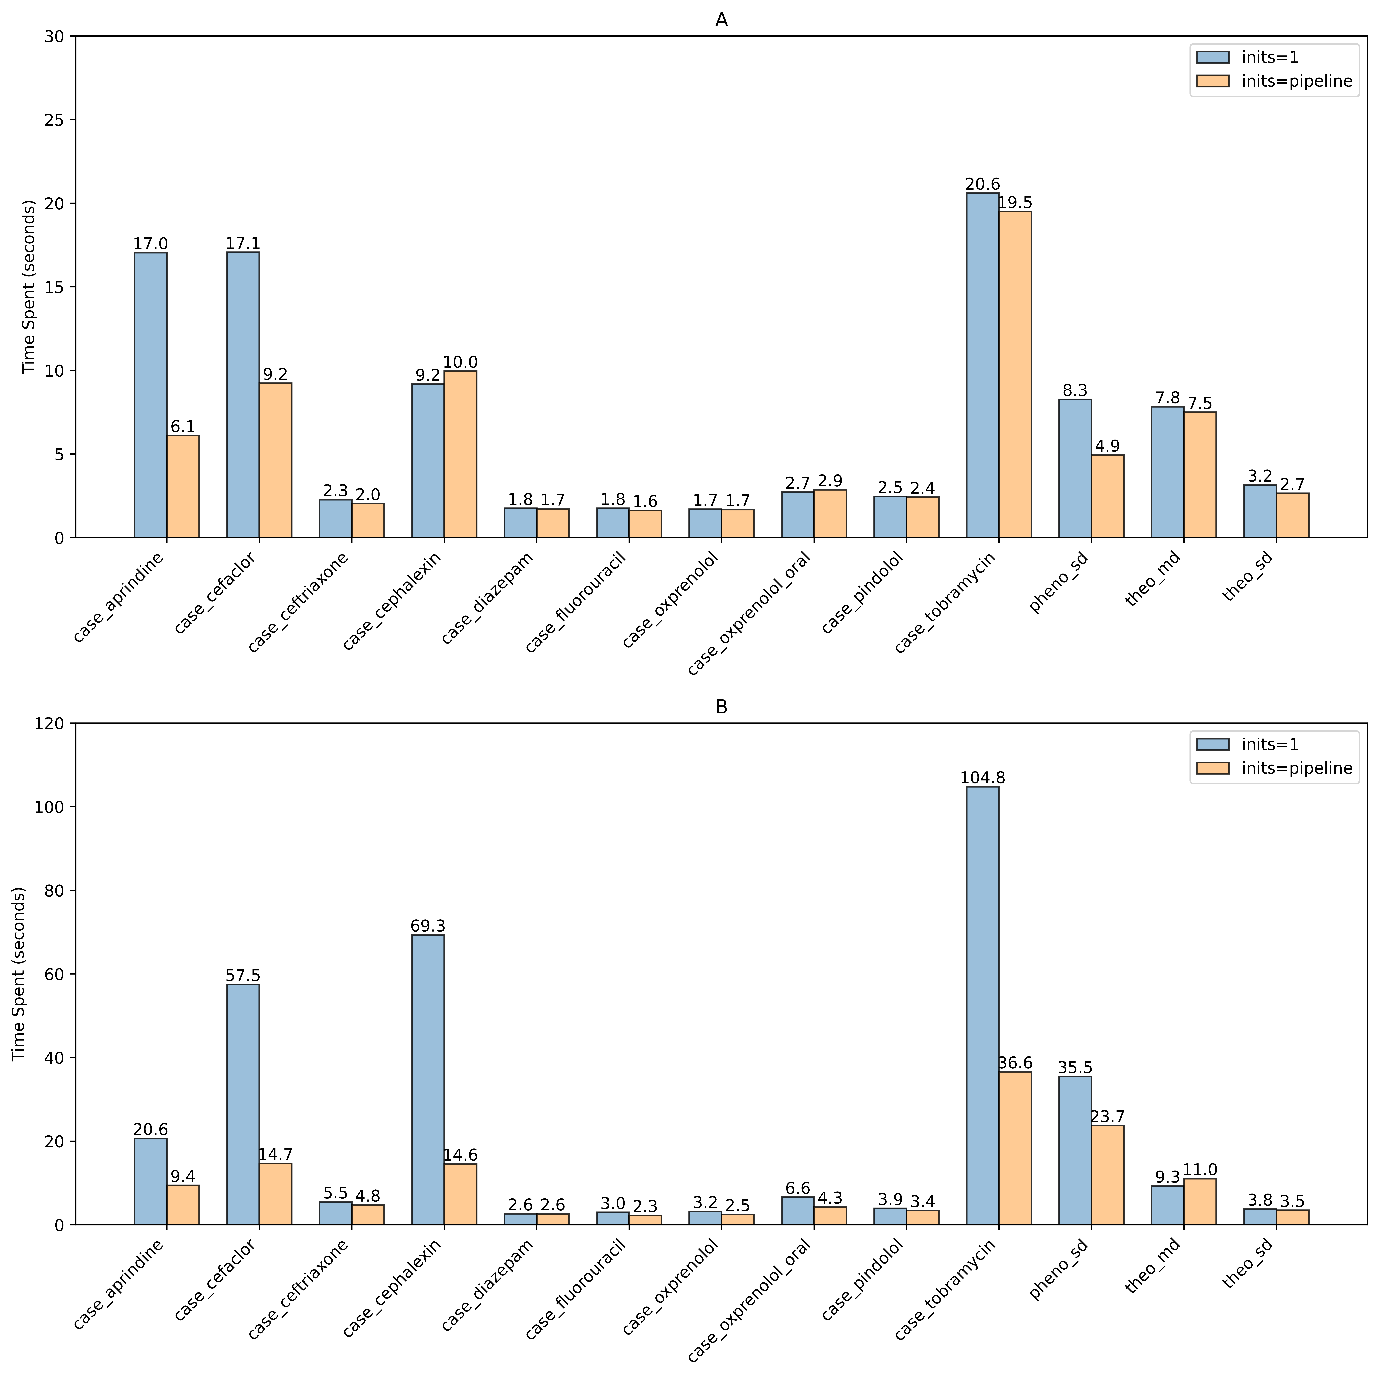
**

"inits = 1" sets all initial estimates to 1. "inits = pipeline" referred to pipeline-specific recommendations.

A. one-compartment model with first-order elimination (and first-order absorption for oral administration). B. two-compartment model with first-order elimination (and first-order absorption for oral administration).

**Supplementary Figure 5.** Model run time on 13 real-life datasets (FOCEI)

**
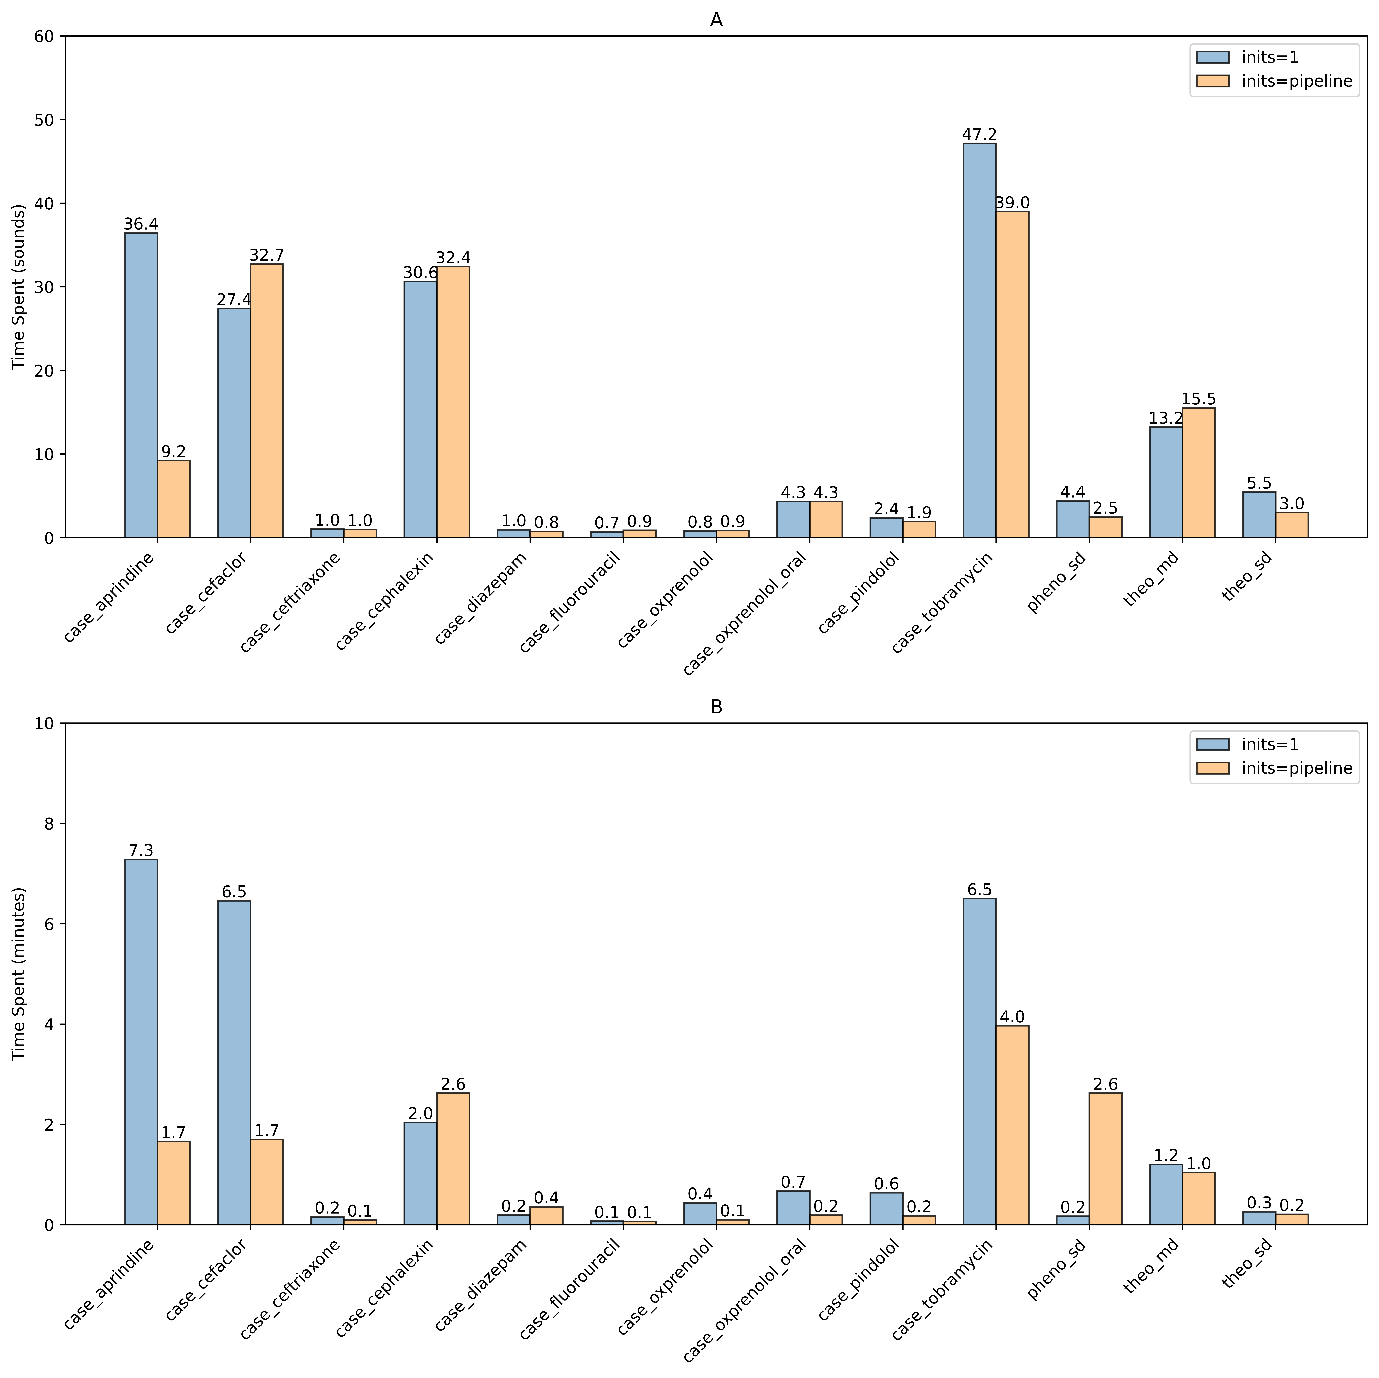
**

"inits = 1" sets all initial estimates to 1. "inits = pipeline" referred to pipeline-specific recommendations.

A. one-compartment model with first-order elimination (and first-order absorption for oral administration). B. two-compartment model with first-order elimination (and first-order absorption for oral administration).

**Supplementary Table 1.** Summary of study characteristics of 10 real-life datasets

| Dataset name | No. of subjects (samples) | Population | Route | Dosing information | Sampling information |
| --- | --- | --- | --- | --- | --- |
| Aprindine [1] | 21 (251)a | Patients | Oral | Multiple doses (200mg at 0h, 100mg at 2h, 100mg at every 12h ) | 0.5, 1, 1.5, 2, 2.5, 3.0, 6.0, 12 h after the initial dose; 0, 1.0, 3.0, 6.0, 12.0, 24.0, 48.0 h, after the last dose (at 60 hours) |
| Cefaclor [2] | 20 (199) | Healthy volunteers | Oral | 250 mg at every 6 hours | 0.5, 0.75, 1.0, 1.5, 2.0, 3.0, 4.0 after initial dose; 72.5, 73.0, 73.5, 74.0, 75.0, 76.0 on day 4 |
| Ceftriaxone [3] | 20 (64) | Neonates | Infusion | 50 mg/kg or 100 mg/kg (infused over 5 minutes) | 1, 12, 24 h (after termination of the infusion)b |
| Cephalexin [2] | 20 (264) | Healthy volunteers | Oral | 250 mg at every 6 hours | 0.5, 0.75, 1.0, 1.5, 2.0, 3.0, 4.0 after initial dose; 72.5, 73.0, 73.5, 74.0, 75.0, 76.0 h on day 4 |
| Diazepam [4, 5] | 14 (149) | Healthy volunteers | Injection | Single injection (10 or 20 mg) | Intensive sampling after dosing (11 samples or 19 samples for a subject) |
| Fluorouracil [6, 7] | 13 (66) | Patients | Injection | Single injection (varied doses) | 5, 10 15, 20, 30, 45, 60, 90, 120 min after initial dose or 5, 10, 20, 30, 60 min after initial dose |
| Oxprenolol (iv) [8] | 6 (102) | Healthy volunteers | Infusion | Single infusion (10 or 20 mg over a 10-min infusion) | 10 (min), 25 (min), 40 (min), 1, 2, 3, 4, 6, 8h ( from the time the  infusion was begun) |
| Oxprenolol (oral) [8] | 6 (203) | Healthy volunteers | Oral | Single dose (20, 40, 80, 160mg) | 0.25, 0.5 1, 2, 4, 6, 8 h |
| Pindolol (iv) [9] | 12 (104) | Healthy volunteers | Oral | Single dose (5mg) | 0.5, 1.0, 2.0, 3.0, 4.0, 6.0, 8.0, 12.0, 24.0 h |
| Tobramycin [10] | 97 (322) | Patients | Bolus/short Infusion | Multiple doses (varied doses) | Sparse sampling (varied time) |

a The number of subjects (samples) is the actual count in the analysis dataset, excluding those with BQLs.

**Supplementary Table 2.** Parameter re-estimates of 21 simulated datasets using different initial estimate strategies (SAEM)

| Run cases | ka | CL | Vc | Vp | Q | Vmax | Km |
| --- | --- | --- | --- | --- | --- | --- | --- |
| *Inits=1 a* |  |  |  |  |  |  |  |
| Bolus_1CPT_rich |  | 3.9 [3.0] b | 66.8 [5.0] |  |  |  |  |
| Bolus_1CPT_semi_sparse |  | 3.94 [2.0] | 71.7 [2.0] |  |  |  |  |
| Bolus_1CPT_sparse1 |  | 1.42 [64.0] | 10.9 [84.0] |  |  |  |  |
| Bolus_1CPT_sparse2 |  | 1.39 [65.0] | 9.26 [87.0] |  |  |  |  |
| Bolus_1CPTMM_rich |  |  | 65.4 [7.0] |  |  | 994 [1.0] | 254 [2.0] |
| Bolus_2CPT_rich |  | 3.8 [5.0] | 53.9 [23.0] | 49.8 [24.0] | 3.99 [0.0] |  |  |
| Bolus_2CPTMM_rich |  |  | 74 [6.0] | 358 [795.0] | 3.69 [8.0] | 31.1 [97.0] | 2.55 [99.0] |
| Infusion_1CPT_rich |  | 4 [0.0] | 71.6 [2.0] |  |  |  |  |
| Infusion_1CPT_semi_sparse |  | 4.02 [0.0] | 80.9 [16.0] |  |  |  |  |
| Infusion_1CPT_sparse1 |  | 1.48 [63.0] | 11.6 [83.0] |  |  |  |  |
| Infusion_1CPT_sparse2 |  | 1.38 [66.0] | 9.03 [87.0] |  |  |  |  |
| Infusion_1CPTMM_rich |  |  | 70.4 [1.0] |  |  | 997 [0.0] | 242 [3.0] |
| Infusion_2CPT_rich |  | 3.92 [2.0] | 67.9 [3.0] | 50.2 [26.0] | 3.92 [2.0] |  |  |
| Infusion_2CPTMM_rich |  |  | 72.7 [4.0] | 257 [542.0] | 3.7 [7.0] | 45.9 [95.0] | 2.52 [99.0] |
| Oral_1CPT_rich | 0.0595 [94.0] | 4.96e+03 [1.24e+05] | 4.75e+03 [6.7e+03] |  |  |  |  |
| Oral_1CPT_semi_sparse | 4.51 [351.0] | 3.94 [2.0] | 72.2 [3.0] |  |  |  |  |
| Oral_1CPT_sparse1 | 0.512 [49.0] | 3.19 [20.0] | 38.7 [45.0] |  |  |  |  |
| Oral_1CPT_sparse2 | 0.39 [61.0] | 3.32 [17.0] | 30 [57.0] |  |  |  |  |
| Oral_1CPTMM_rich | 1 [0.0] |  | 68.8 [2.0] |  |  | 979 [2.0] | 239 [4.0] |
| Oral_2CPT_rich | 0.833 [17.0] | 3.85 [4.0] | 58.6 [16.0] | 51.2 [28.0] | 5.03 [26.0] |  |  |
| Oral_2CPTMM_rich | 1.12 [12.0] |  | 76.6 [9.0] | 380 [850.0] | 3.82 [5.0] | 4.24 [100.0] | 2.42 [99.0] |
|  |  |  |  |  |  |  |  |
| *Inits=nls* |  |  |  |  |  |  |  |
| Bolus_1CPT_rich |  | 3.9 [3.0] | 66.8 [5.0] |  |  |  |  |
| Bolus_1CPT_semi_sparse |  | 3.94 [2.0] | 71.9 [3.0] |  |  |  |  |
| Bolus_2CPT_rich |  | 3.87 [3.0] | 65.7 [6.0] | 49.5 [24.0] | 4.04 [1.0] |  |  |
| Infusion_1CPT_rich |  | 4 [0.0] | 71.6 [2.0] |  |  |  |  |
| Infusion_1CPT_semi_sparse |  | 4.02 [0.0] | 81.2 [16.0] |  |  |  |  |
| Infusion_2CPT_rich |  | 3.92 [2.0] | 68 [3.0] | 50.1 [25.0] | 3.9 [3.0] |  |  |
| Oral_1CPT_rich | 1.01 [1.0] | 4.01 [0.0] | 66.9 [4.0] |  |  |  |  |
| Oral_1CPT_semi_sparse | 2.19 [119.0] | 4 [0.0] | 72.2 [3.0] |  |  |  |  |
| Oral_1CPT_sparse1 | 2.72 [172.0] | 2.78e-74 [100.0] | 1.26e+22 [1.8e+22] |  |  |  |  |
| Oral_1CPT_sparse2 | 2.72 [172.0] | 2.59e-74 [100.0] | 1.14e+22 [1.63e+22] |  |  |  |  |
| Oral_2CPT_rich | 1.67 [67.0] | 3.77 [6.0] | 105 [50.0] | 1e+11 [2.5e+11] | 4.06e-11 [100.0] |  |  |
|  |  |  |  |  |  |  |  |
| *Inits=nlm* |  |  |  |  |  |  |  |
| Bolus_1CPT_rich |  | 3.9 [3.0] | 66.8 [5.0] |  |  |  |  |
| Bolus_1CPT_semi_sparse |  | 3.94 [2.0] | 72 [3.0] |  |  |  |  |
| Bolus_1CPT_sparse1 |  | 0.00227 [100.0] | 0 [100.0] |  |  |  |  |
| Bolus_1CPTMM_rich |  |  | 65.4 [7.0] |  |  | 999 [0.0] | 257 [3.0] |
| Bolus_2CPT_rich |  | 3.8 [5.0] | 53.9 [23.0] | 49.8 [24.0] | 3.99 [0.0] |  |  |
| Infusion_1CPT_rich |  | 4 [0.0] | 71.6 [2.0] |  |  |  |  |
| Infusion_1CPT_semi_sparse |  | 4.02 [0.0] | 81.1 [16.0] |  |  |  |  |
| Infusion_1CPT_sparse1 |  | 3.58e-07 [100.0] | 5.09e-11 [100.0] |  |  |  |  |
| Infusion_1CPT_sparse2 |  | 7.16e-07 [100.0] | 0 [100.0] |  |  |  |  |
| Infusion_1CPTMM_rich |  |  | 70.4 [1.0] |  |  | 1e+03 [0.0] | 246 [2.0] |
| Infusion_2CPT_rich |  | 3.92 [2.0] | 68 [3.0] | 50.2 [26.0] | 3.9 [3.0] |  |  |
| Oral_1CPT_semi_sparse | 3.98 [298.0] | 3.95 [1.0] | 72.1 [3.0] |  |  |  |  |
| Oral_1CPT_sparse1 | 0.593 [41.0] | 3.36 [16.0] | 44.8 [36.0] |  |  |  |  |
| Oral_1CPT_sparse2 | 0.416 [58.0] | 3.38 [16.0] | 31.9 [54.0] |  |  |  |  |
| Oral_1CPTMM_rich | 0.999 [0.0] |  | 68.8 [2.0] |  |  | 987 [1.0] | 245 [2.0] |
| Oral_2CPT_rich | 1.42 [42.0] | 4.32 [8.0] | 3.09 [96.0] | 83.6 [109.0] | 8.64 [116.0] |  |  |
| Oral_2CPTMM_rich | 0.895 [10.0] |  | 66 [6.0] | 316 [690.0] | 3.59 [10.0] | 43.4 [96.0] | 3.53 [99.0] |
|  |  |  |  |  |  |  |  |
| *Inits=nlminb* |  |  |  |  |  |  |  |
| Bolus_1CPT_rich |  | 3.9 [3.0] | 66.8 [5.0] |  |  |  |  |
| Bolus_1CPT_semi_sparse |  | 3.95 [1.0] | 71.3 [2.0] |  |  |  |  |
| Bolus_1CPT_sparse2 |  | 1.41 [65.0] | 9.42 [87.0] |  |  |  |  |
| Bolus_1CPTMM_rich |  |  | 65.3 [7.0] |  |  | 1e+03 [0.0] | 258 [3.0] |
| Infusion_1CPT_rich |  | 5.95e-12 [100.0] | 274 [291.0] |  |  |  |  |
| Infusion_1CPT_semi_sparse |  | 4.02 [0.0] | 81.2 [16.0] |  |  |  |  |
| Infusion_1CPTMM_rich |  |  | 9.53e+04 [1.36e+05] |  |  | 3.34e+07 [3.34e+06] | 0.00112 [100.0] |
| Infusion_2CPT_rich |  | 7.21e-12 [100.0] | 88.3 [26.0] | 1.78e+05 [4.45e+05] | 3.79 [5.0] |  |  |
| Oral_1CPT_rich | 5.66 [466.0] | 1.51e-09 [100.0] | 320 [357.0] |  |  |  |  |
| Oral_1CPT_semi_sparse | 4.51 [351.0] | 3.94 [2.0] | 72.2 [3.0] |  |  |  |  |
| Oral_1CPT_sparse1 | 2.72 [172.0] | 9.69e+15 [2.42e+17] | 54.6 [22.0] |  |  |  |  |
| Oral_1CPT_sparse2 | 1.01 [1.0] | 3.93 [2.0] | 68.5 [2.0] |  |  |  |  |
| Oral_2CPTMM_rich | 1.7 [70.0] |  | 102 [46.0] | 1.38e+29 [3.45e+29] | 0.735 [82.0] | 230 [77.0] | 23.9 [90.0] |
|  |  |  |  |  |  |  |  |
| *Inits=pipeline* |  |  |  |  |  |  |  |
| Bolus_1CPT_rich |  | 3.9 [3.0] | 66.8 [5.0] |  |  |  |  |
| Bolus_1CPT_semi_sparse |  | 3.93 [2.0] | 72.7 [4.0] |  |  |  |  |
| Bolus_1CPT_sparse1 |  | 4.01 [0.0] | 69.9 [0.0] |  |  |  |  |
| Bolus_1CPT_sparse2 |  | 3.84 [4.0] | 55.6 [21.0] |  |  |  |  |
| Bolus_1CPTMM_rich |  |  | 65.3 [7.0] |  |  | 997 [0.0] | 257 [3.0] |
| Bolus_2CPT_rich |  | 3.87 [3.0] | 65.7 [6.0] | 49.5 [24.0] | 4.03 [1.0] |  |  |
| Bolus_2CPTMM_rich |  |  | 70.3 [0.0] | 51.5 [29.0] | 3.94 [2.0] | 1e+03 [0.0] | 251 [0.0] |
| Infusion_1CPT_rich |  | 4 [0.0] | 71.6 [2.0] |  |  |  |  |
| Infusion_1CPT_semi_sparse |  | 4.02 [0.0] | 81.3 [16.0] |  |  |  |  |
| Infusion_1CPT_sparse1 |  | 3.98 [1.0] | 71.9 [3.0] |  |  |  |  |
| Infusion_1CPT_sparse2 |  | 3.92 [2.0] | 72.6 [4.0] |  |  |  |  |
| Infusion_1CPTMM_rich |  |  | 70.3 [0.0] |  |  | 1.01e+03 [1.0] | 248 [1.0] |
| Infusion_2CPT_rich |  | 3.92 [2.0] | 67.9 [3.0] | 50.2 [26.0] | 3.9 [3.0] |  |  |
| Infusion_2CPTMM_rich |  |  | 70.2 [0.0] | 50.6 [26.0] | 3.92 [2.0] | 1.01e+03 [1.0] | 249 [0.0] |
| Oral_1CPT_rich | 1.01 [1.0] | 4.01 [0.0] | 66.9 [4.0] |  |  |  |  |
| Oral_1CPT_semi_sparse | 1.48 [48.0] | 4.05 [1.0] | 71.5 [2.0] |  |  |  |  |
| Oral_1CPT_sparse1 | 1.19 [19.0] | 4.09 [2.0] | 76.8 [10.0] |  |  |  |  |
| Oral_1CPT_sparse2 | 0.911 [9.0] | 3.92 [2.0] | 63.2 [10.0] |  |  |  |  |
| Oral_1CPTMM_rich | 0.985 [2.0] |  | 68 [3.0] |  |  | 1.02e+03 [2.0] | 260 [4.0] |
| Oral_2CPT_rich | 0.926 [7.0] | 3.87 [3.0] | 67.6 [3.0] | 47.2 [18.0] | 4.24 [6.0] |  |  |
| Oral_2CPTMM_rich | 0.957 [4.0] |  | 68.2 [3.0] | 51.2 [28.0] | 4.31 [8.0] | 1.03e+03 [3.0] | 276 [10.0] |

Cases those failed to get parameter estimates were not listed in the table.

a "*inits = 1*" sets all initial estimates to 1, while "*inits = nls*," "*inits = nlm*," and "*inits = nlminb*" used parameter estimates from respective algorithms as initial values. "*inits = pipeline*" referred to pipeline-specific recommendations.

b Values represent the estimated value, along with its relative error compared to original values in the simulated dataset. The original values using for generating simulated dataset are as follows: ka = 1 h-1, CL = 4 L/h, Vc = 70 L, Vp = 40 L, Q = 4 L/h, Vmax = 1000 mg/h, and Km = 250 mg/L.

**Supplementary Table 3.** Parameter re-estimates of 21 simulated datasets using different initial estimate strategies (FOCEI)

| Dataset | Ka | CL | Vc | Vp | Q | Vmax | Km |
| --- | --- | --- | --- | --- | --- | --- | --- |
| *Inits=1* |  |  |  |  |  |  |  |
| Bolus_1CPT_rich |  | 2.72 [32.0] | 2.72 [96.0] |  |  |  |  |
| Bolus_1CPT_semi_sparse |  | 2.72 [32.0] | 2.72 [96.0] |  |  |  |  |
| Bolus_1CPT_sparse1 |  | 5.64 [41.0] | 1.37 [98.0] |  |  |  |  |
| Bolus_1CPT_sparse2 |  | 103 [2475.0] | 0.0879 [100.0] |  |  |  |  |
| Bolus_1CPTMM_rich |  |  | 2.56 [96.0] |  |  | 2.72 [100.0] | 2.73 [99.0] |
| Bolus_2CPT_rich |  | 2.72 [32.0] | 2.72 [96.0] | 2.72 [93.0] | 2.72 [32.0] |  |  |
| Bolus_2CPTMM_rich |  |  | 72.9 [4.0] | 479 [1098.0] | 3.54 [12.0] | 1.17 [100.0] | 14.5 [94.0] |
| Infusion_1CPT_rich |  | 0.41 [90.0] | 2.6 [96.0] |  |  |  |  |
| Infusion_1CPT_semi_sparse |  | 2.48 [38.0] | 2.74 [96.0] |  |  |  |  |
| Infusion_1CPT_sparse1 |  | 2.72 [32.0] | 2.72 [96.0] |  |  |  |  |
| Infusion_1CPT_sparse2 |  | 2.72 [32.0] | 2.23 [97.0] |  |  |  |  |
| Infusion_1CPTMM_rich |  |  | 2.72 [96.0] |  |  | 2.72 [100.0] | 2.72 [99.0] |
| Infusion_2CPT_rich |  | 2.72 [32.0] | 2.72 [96.0] | 2.72 [93.0] | 2.72 [32.0] |  |  |
| Infusion_2CPTMM_rich |  |  | 70.6 [1.0] | 50.7 [27.0] | 3.85 [4.0] | 954 [5.0] | 213 [15.0] |
| Oral_1CPT_rich | 2.72 [172.0] | 2.72 [32.0] | 2.72 [96.0] |  |  |  |  |
| Oral_1CPT_semi_sparse | 2.27 [127.0] | 2.71 [32.0] | 2.75 [96.0] |  |  |  |  |
| Oral_1CPT_sparse1 | 1 [0.0] | 2.72 [32.0] | 2.72 [96.0] |  |  |  |  |
| Oral_1CPT_sparse2 | 1 [0.0] | 2.72 [32.0] | 2.72 [96.0] |  |  |  |  |
| Oral_1CPTMM_rich | 3.06 [206.0] |  | 4.11 [94.0] |  |  | 2.95 [100.0] | 6.64 [97.0] |
| Oral_2CPT_rich | 2.72 [172.0] | 2.72 [32.0] | 2.72 [96.0] | 2.72 [93.0] | 2.72 [32.0] |  |  |
|  |  |  |  |  |  |  |  |
| *Inits=nls* |  |  |  |  |  |  |  |
| Bolus_1CPT_rich |  | 3.91 [2.0] | 66.9 [4.0] |  |  |  |  |
| Bolus_1CPT_semi_sparse |  | 4.03 [1.0] | 70.1 [0.0] |  |  |  |  |
| Bolus_2CPT_rich |  | 3.88 [3.0] | 66.1 [6.0] | 49.2 [23.0] | 4.01 [0.0] |  |  |
| Infusion_1CPT_rich |  | 4.02 [0.0] | 71.5 [2.0] |  |  |  |  |
| Infusion_1CPT_semi_sparse |  | 4.15 [4.0] | 79.4 [13.0] |  |  |  |  |
| Infusion_2CPT_rich |  | 3.93 [2.0] | 68.1 [3.0] | 49.5 [24.0] | 3.88 [3.0] |  |  |
| Oral_1CPT_rich | 0.992 [1.0] | 3.99 [0.0] | 67 [4.0] |  |  |  |  |
| Oral_1CPT_semi_sparse | 0.968 [3.0] | 4.24 [6.0] | 68.1 [3.0] |  |  |  |  |
| Oral_1CPT_sparse1 | 2.72 [172.0] | 7.03e-73 [100.0] | 9e+27 [1.29e+28] |  |  |  |  |
| Oral_1CPT_sparse2 | 2.72 [172.0] | inf [inf] | 1.14e+22 [1.63e+22] |  |  |  |  |
| Oral_2CPT_rich | 2.72 [172.0] | 3.97 [1.0] | 111 [59.0] | 4.8e+09 [1.20e+10] | 7.25e-12 [100.0] |  |  |
|  |  |  |  |  |  |  |  |
| *Inits=nlm* |  |  |  |  |  |  |  |
| Bolus_1CPT_rich |  | 2.86 [29.0] | 2.86 [96.0] |  |  |  |  |
| Bolus_1CPT_semi_sparse |  | 2.89 [28.0] | 2.59 [96.0] |  |  |  |  |
| Bolus_1CPT_sparse1 |  | 2.29e-07 [100.0] | 0 [100.0] |  |  |  |  |
| Bolus_1CPTMM_rich |  |  | 3.38 [95.0] |  |  | 2.65 [100.0] | 2.8 [99.0] |
| Bolus_2CPT_rich |  | 2.72 [32.0] | 2.72 [96.0] | 2.72 [93.0] | 2.72 [32.0] |  |  |
| Infusion_1CPT_rich |  | 3.74 [6.0] | 90 [29.0] |  |  |  |  |
| Infusion_1CPT_semi_sparse |  | 2.81 [30.0] | 2.54 [96.0] |  |  |  |  |
| Infusion_1CPT_sparse1 |  | 3.7e-07 [100.0] | 5.13e-10 [100.0] |  |  |  |  |
| Infusion_1CPT_sparse2 |  | 6.82e-07 [100.0] | 0 [100.0] |  |  |  |  |
| Infusion_2CPT_rich |  | 2.89 [28.0] | 3 [96.0] | 2.72 [93.0] | 2.75 [31.0] |  |  |
| Oral_1CPT_semi_sparse | 2.01 [101.0] | 2.8 [30.0] | 2.55 [96.0] |  |  |  |  |
| Oral_1CPT_sparse1 | 0.0864 [91.0] | 3.33 [17.0] | 7.92 [89.0] |  |  |  |  |
| Oral_1CPT_sparse2 | 0.092 [91.0] | 3.77 [6.0] | 7.92 [89.0] |  |  |  |  |
| Oral_1CPTMM_rich | 3.01 [201.0] |  | 3.46 [95.0] |  |  | 3.37 [100.0] | 2.58 [99.0] |
| Oral_2CPT_rich | 2.72 [172.0] | 2.72 [32.0] | 2.66 [96.0] | 2.72 [93.0] | 2.72 [32.0] |  |  |
| Oral_2CPTMM_rich | 0.997 [0.0] |  | 70.5 [1.0] | 47.1 [18.0] | 4.08 [2.0] | 971 [3.0] | 240 [4.0] |
|  |  |  |  |  |  |  |  |
| *Inits=nlminb* |  |  |  |  |  |  |  |
| Bolus_1CPT_rich |  | 2.72 [32.0] | 2.72 [96.0] |  |  |  |  |
| Bolus_1CPT_semi_sparse |  | 2.2 [45.0] | 2.42 [97.0] |  |  |  |  |
| Bolus_1CPT_sparse2 |  | 5.56 [39.0] | 0.516 [99.0] |  |  |  |  |
| Bolus_1CPTMM_rich |  |  | 65.2 [7.0] |  |  | 996 [0.0] | 254 [2.0] |
| Infusion_1CPT_semi_sparse |  | 3.37 [16.0] | 2.51 [96.0] |  |  |  |  |
| Infusion_1CPTMM_rich |  |  | 45.7 [35.0] |  |  | 8e+04 [7.9e+03] | 7.1 [97.0] |
| Infusion_2CPT_rich |  | 8.91e-12 [100.0] | 79.8 [14.0] | 12.9 [68.0] | 699 [17375.0] |  |  |
| Oral_1CPT_semi_sparse | 2.27 [127.0] | 2.71 [32.0] | 2.75 [96.0] |  |  |  |  |
| Oral_1CPT_sparse1 | 2.72 [172.0] | 9.69e+15 [2.42e+17] | 54.6 [22.0] |  |  |  |  |
| Oral_1CPT_sparse2 | 0.86 [14.0] | 4.05 [1.0] | 63.5 [9.0] |  |  |  |  |
| Oral_2CPTMM_rich | 2.72 [172.0] |  | 81.5 [16.0] | 1.53e+29 [3.825e+29] | 14.9 [272.0] | 4.57 [100.0] | 2.72 [99.0] |
|  |  |  |  |  |  |  |  |
| *Inits=pipeline* |  |  |  |  |  |  |  |
| Bolus_1CPT_rich |  | 3.91 [2.0] | 67.1 [4.0] |  |  |  |  |
| Bolus_1CPT_semi_sparse |  | 4.03 [1.0] | 70.2 [0.0] |  |  |  |  |
| Bolus_1CPT_sparse1 |  | 4.04 [1.0] | 67.6 [3.0] |  |  |  |  |
| Bolus_1CPT_sparse2 |  | 3.95 [1.0] | 56.7 [19.0] |  |  |  |  |
| Bolus_1CPTMM_rich |  |  | 65.2 [7.0] |  |  | 994 [1.0] | 254 [2.0] |
| Bolus_2CPT_rich |  | 3.87 [3.0] | 65.8 [6.0] | 49.2 [23.0] | 4.04 [1.0] |  |  |
| Bolus_2CPTMM_rich |  |  | 70.6 [1.0] | 50.3 [26.0] | 3.91 [2.0] | 987 [1.0] | 231 [8.0] |
| Infusion_1CPT_rich |  | 4.02 [0.0] | 71.6 [2.0] |  |  |  |  |
| Infusion_1CPT_semi_sparse |  | 4.16 [4.0] | 79.7 [14.0] |  |  |  |  |
| Infusion_1CPT_sparse1 |  | 4.27 [7.0] | 82 [17.0] |  |  |  |  |
| Infusion_1CPT_sparse2 |  | 4.35 [9.0] | 76.7 [10.0] |  |  |  |  |
| Infusion_1CPTMM_rich |  |  | 70.5 [1.0] |  |  | 1.01e+03 [1.0] | 245 [2.0] |
| Infusion_2CPT_rich |  | 3.96 [1.0] | 68.1 [3.0] | 49.5 [24.0] | 3.9 [3.0] |  |  |
| Infusion_2CPTMM_rich |  |  | 70.7 [1.0] | 49.7 [24.0] | 3.91 [2.0] | 1.01e+03 [1.0] | 238 [5.0] |
| Oral_1CPT_rich | 0.99 [1.0] | 4.01 [0.0] | 66.6 [5.0] |  |  |  |  |
| Oral_1CPT_semi_sparse | 0.984 [2.0] | 4.23 [6.0] | 68.5 [2.0] |  |  |  |  |
| Oral_1CPT_sparse1 | 0.879 [12.0] | 3.9 [3.0] | 62.2 [11.0] |  |  |  |  |
| Oral_1CPT_sparse2 | 0.862 [14.0] | 4.06 [1.0] | 63.7 [9.0] |  |  |  |  |
| Oral_1CPTMM_rich | 0.972 [3.0] |  | 68 [3.0] |  |  | 992 [1.0] | 243 [3.0] |
| Oral_2CPT_rich | 0.931 [7.0] | 3.89 [3.0] | 68.5 [2.0] | 46.2 [16.0] | 4.21 [5.0] |  |  |
| Oral_2CPTMM_rich | 0.983 [2.0] |  | 70.6 [1.0] | 48.8 [22.0] | 4.01 [0.0] | 990 [1.0] | 252 [1.0] |

Cases those failed to get parameter estimates were not listed in the table.

a "*inits = 1*" sets all initial estimates to 1, while "*inits = nls*," "*inits = nlm*," and "*inits = nlminb*" used parameter estimates from respective algorithms as initial values. "*inits = pipeline*" referred to pipeline-specific recommendations.

b Values represent the estimated value, along with its relative error compared to original values in the simulated dataset. The original values using for generating simulated dataset are as follows: ka = 1 h-1, CL = 4 L/h, Vc = 70 L, Vp = 40 L, Q = 4 L/h, Vmax = 1000 mg/h, and Km = 250 mg/L.

**Supplementary Table 4.** Statistics of final parameter estimates within 20% and 30% of original values across five initial estimate strategies in simulated datasets (SAEM)

| Dataset | Ka | CL | Vc | Vp | Q | Vmax | Km | Vc (1CPT) | Vc (2CPT) | All b |
| --- | --- | --- | --- | --- | --- | --- | --- | --- | --- | --- |
| Count of Estimates with Deviation ≤ 20% [% of all ] a | | | | | | | | | | |
| *Inits=1* | 3 [42.86] | 10 [66.67] | 13 [61.90] | 0 [0.00] | 5 [83.33] | 3 [50.00] | 3 [50.00] | 8 [53.33] | 5 [83.33] | 7 [33.33] |
| *Inits=nls* | 1 [14.29] | 9 [60.00] | 8 [38.10] | 0 [0.00] | 2 [33.33] | 0 [0.00] | 0 [0.00] | 6 [40.00] | 2 [33.33] | 5 [23.81] |
| *Inits=nlm* | 2 [28.57] | 10 [66.67] | 10 [47.62] | 0 [0.00] | 3 [50.00] | 3 [50.00] | 3 [50.00] | 8 [53.33] | 2 [33.33] | 7 [33.33] |
| *Inits=nlminb* | 1 [14.29] | 5 [33.33] | 6 [28.57] | 0 [0.00] | 1 [16.67] | 1 [16.67] | 1 [16.67] | 6 [40.00] | 0 [0.00] | 5 [23.81] |
| *Inits=pipeline* | **6 [85.71]** | **15 [100.00]** | **20 [95.24]** | **1 [16.67]** | **6 [100.00]** | **6 [100.00]** | **6 [100.00]** | **14 [93.33]** | **6 [100.00]** | **14 [66.67]** |
| Count of Estimates with Deviation ≤ 30% [% of all ] | | | | | | | | | | |
| *Inits=1* | 3 [42.86] | 10 [66.67] | 14 [66.67] | 3 [50.00] | 6 [100.00] | 3 [50.00] | 3 [50.00] | 8 [53.33] | 6 [100.00] | 10 [47.62] |
| *Inits=nls* | 1 [14.29] | 9 [60.00] | 8 [38.10] | 2 [33.33] | 2 [33.33] | 0 [0.00] | 0 [0.00] | 6 [40.00] | 2 [33.33] | 7 [33.33] |
| *Inits=nlm* | 2 [28.57] | 10 [66.67] | 11 [52.38] | 2 [33.33] | 3 [50.00] | 3 [50.00] | 3 [50.00] | 8 [53.33] | 3 [50.00] | 9 [42.86] |
| *Inits=nlminb* | 1 [14.29] | 5 [33.33] | 8 [38.10] | 0 [0.00] | 1 [16.67] | 1 [16.67] | 1 [16.67] | 7 [46.67] | 1 [16.67] | 5 [23.81] |
| *Inits=pipeline* | **6 [85.71]** | **15 [100.00]** | **21 [100.00]** | **6 [100.00]** | **6 [100.00]** | **6 [100.00]** | **6 [100.00]** | **15 [100.00]** | **6 [100.00]** | **20 [95.2%]** |

a Count [percentage] represents the number of cases within the specified deviation threshold for each parameter and the proportion of cases where the estimates fall within the specified threshold, relative to the total number of cases where that parameter was estimated.

b Values in “All” column represent the count and percentage of cases where all parameters satisfy the specified deviation threshold.

.

**Supplementary Table 5.** Statistics of final parameter estimates within 20% and 30% of original values across five initial estimate strategies in simulated datasets (FOCEI)

| Dataset | Ka | CL | Vc | Vp | Q | Vmax | Km | Vc (1CMPT) | Vc (2CMPT) | All b |
| --- | --- | --- | --- | --- | --- | --- | --- | --- | --- | --- |
| Count of Estimates with Deviation ≤ 20% [% of all ] a | | | | | | | | | | |
| *Inits=1* | 2 [28.57] | 0 [0.00] | 2 [9.52] | 0 [0.00] | 2 [33.33] | 1 [16.67] | 1 [16.67] | 0 [0.00] | 2 [33.33] | 0 [0.00] |
| *Inits=nls* | 2 [28.57] | 9 [60.00] | 8 [38.10] | 0 [0.00] | 2 [33.33] | 0 [0.00] | 0 [0.00] | 6 [40.00] | 2 [33.33] | 6 [28.57] |
| *Inits=nlm* | 1 [14.29] | 3 [20.00] | 1 [4.76] | 1 [16.67] | 1 [16.67] | 1 [16.67] | 1 [16.67] | 0 [0.00] | 1 [16.67] | 1 [4.77] |
| *Inits=nlminb* | 1 [14.29] | 2 [13.33] | 4 [19.05] | 0 [0.00] | 0 [0.00] | 1 [16.67] | 1 [16.67] | 2 [13.33] | 2 [33.33] | 2 [9.52] |
| *Inits=pipeline* | **7 [100.00]** | **15 [100.00]** | **21 [100.00]** | **1 [16.67]** | **6 [100.00]** | **6 [100.00]** | **6 [100.00]** | **15 [100.00]** | **6 [100.00]** | **16 [76.19]** |
| Count of Estimates with Deviation ≤ 30% [% of all ] | | | | | | | | | | |
| *Inits=1* | 2 [28.57] | 0 [0.00] | 2 [9.52] | 1 [16.67] | 2 [33.33] | 1 [16.67] | 1 [16.67] | 0 [0.00] | 2 [33.33] | 1 [4.76] |
| *Inits=nls* | 2 [28.57] | 9 [60.00] | 8 [38.10] | 2 [33.33] | 2 [33.33] | 0 [0.00] | 0 [0.00] | 6 [40.00] | 2 [33.33] | 8 [38.10] |
| *Inits=nlm* | 1 [14.29] | 8 [53.33] | 2 [9.52] | 1 [16.67] | 1 [16.67] | 1 [16.67] | 1 [16.67] | 1 [6.67] | 1 [16.67] | 2 [9.52] |
| *Inits=nlminb* | 1 [14.29] | 2 [13.33] | 5 [23.81] | 0 [0.00] | 0 [0.00] | 1 [16.67] | 1 [16.67] | 3 [20.00] | 2 [33.33] | 2 [9.52] |
| *Inits=pipeline* | **7 [100.00]** | **15 [100.00]** | **21 [100.00]** | **6 [100.00]** | **6 [100.00]** | **6 [100.00]** | **6 [100.00]** | **15 [100.00]** | **6 [100.00]** | **21 [100.00]** |

a Count [percentage] represents the number of cases within the specified deviation threshold for each parameter and the proportion of cases where the estimates fall within the specified threshold, relative to the total number of cases where that parameter was estimated.

b Values in “All” column represent the count and percentage of cases where all parameters satisfy the specified deviation threshold.

**Supplementary Table 6.** Initial estimates recommended by the pipeline for 13 real-life datasets

| Datasets | Methods for 1CMPT parameters | ka | CL | Vc (1CMPT) | Vc (2CMPT) | Vp | Q |
| --- | --- | --- | --- | --- | --- | --- | --- |
| pheno_sd | Adaptive single-point method |  | 0.00966 | 1.31 | 1.31 | 0.131 | 1 |
| theo_sd | NCA (only first dose) | 0.986 | 2.95 | 30.9 | 30.9 | 3.09 | 1 |
| theo_md | Adaptive single-point method | 1.25 | 2.38 | 30 | 30 | 30 | 2.38 |
| aprindine | Adaptive single-point method | 0.278 | 3.12 | 326 | 326 | 32.6 | 1 |
| cefaclor | Adaptive single-point method | 1.38 | 15.5 | 72.2 | 66.7 | 667 | 15.5 |
| ceftriaxone | NCA (only first dose) |  | 0.16 | 1.14 | 1.14 | 0.57 | 0.16 |
| cephalexin | Graphic analysis | 3.93 | 12 | 14.6 | 14.6 | 73 | 1 |
| diazepam | NCA (only first dose) |  | 3.07 | 56 | 19 | 38 | 10 |
| fluorouracil | NCA (only first dose) |  | 93.2 | 22.9 | 22.9 | 114 | 10 |
| oxprenolol (iv) | NCA (only first dose) |  | 23 | 63.7 | 37.8 | 18.9 | 10 |
| oxprenolol (oral) | Graphic analysis | 1.48 | 65.7 | 191 | 191 | 382 | 1 |
| pindolol | Graphic analysis | 2.57 | 23.3 | 140 | 140 | 70 | 1 |
| tobramycin | NCA (data exclude first-dose part) |  | 5.12 | 20.9 | 20.9 | 10.4 | 1 |

1CMPT: one-compartment model; 2CMPT: two-compartment model

Except for the pheno_sd case, where the unit of CL is L/h/kg and the unit of V is L/kg, the units of CL and V in all other cases are L/h and L, respectively.

**Supplementary Table 7.** Comparison of parameter estimation results using initial estimates set to 1 vs. pipeline recommendations for one- and two-compartment models (run by SAEM)

| Dataset | *inits = 1* (1cmpt_fo) | *inits = 1* (2cmpt_fo) | *inits = pipeline* (1cmpt_fo) | *inits = pipeline* (2cmpt_fo) |
| --- | --- | --- | --- | --- |
| pheno_sd | CL = 0.00562 [2.21] a Vc = 1.51 [17] add = 4.29 prop = 0.165 AIC = 2959 Run_time = 0.138 mins | CL = 0.00546 [2.31] Vc = 0.0863 [35.2] Vp = 1.27 [33.8] Q = 5.26 [136] add = 4.34 prop = 0.172 AIC = 6213 Run_time = 0.591 mins | CL = 0.00579 [2.14] Vc = 1.5 [17.3] add = 4.34 prop = 0.17 AIC = 1124 Run_time = 0.0824 mins | CL = 0.00592 [2.05] Vc = 1.15 [194] Vp = 0.315 [77.7] Q = 2.15 [664] add = 4.64 prop = 0.176 AIC = 1131 Run_time = 0.395 mins |
| theo_sd | ka = 1.42 [52.6]  CL/F = 2.8 [7.9] Vc/F = 31.3 [1.18] add = 0.273 prop = 0.167 AIC = 368 Run_time = 0.0525 mins | ka = 0.166 [18.5]  CL/F = 2.77 [8.3] Vc/F = 3.52 [30] Vp/F = 14.2 [12.3] Q/F = 2.33 [76.5] add = 0.265 prop = 0.156 AIC = 484 Run_time = 0.063 mins | ka = 1.43 [51.6]  CL/F = 2.8 [7.96] Vc/F = 31.4 [1.18] add = 0.273 prop = 0.167 AIC = 384 Run_time = 0.0442 mins | ka = 1.35 [116]  CL/F = 2.8 [8.12] Vc/F = 29.9 [9.3] Vp/F = 1.14 [5.69e+03] Q/F = 1.48 [2.74e+03] add = 0.283 prop = 0.166 AIC = 459 Run_time = 0.0579 mins |
| theo_md | ka = 1.31 [55.5]  CL/F = 2.91 [6.26] Vc/F = 31.2 [1.19] add = 0.68 prop = 0.163 AIC = 889 Run_time = 0.131 mins | ka = 0.158 [18.2]  CL/F = 2.89 [6.29] Vc/F = 3.63 [28.3] Vp/F = 12.1 [15.8] Q = 1.97 [108] add = 0.641 prop = 0.159 AIC = 991 Run_time = 0.155 mins | ka = 1.33 [52.8]  CL/F = 2.9 [6.21] Vc/F = 31.5 [1.19] add = 0.665 prop = 0.166 AIC = 901 Run_time = 0.125 mins | ka = 1.24 [72.7]  CL/F = 2.63 [34.4] Vc/F = 30.3 [1.51] Vp/F = 79.8 [91.8] Q/F = 0.56 [253] add = 0.727 prop = 0.152 AIC = 916 Run_time = 0.184 mins |
| aprindine | ka = 11 [3.97e+03]  CL/F = 102 [9.15e+03] Vc/F = 0.0149 [6.47e+03] add = 1.75 prop = 0.00159 AIC = 1004 Run_time = 0.284 mins | ka = 60.9 [8.14e+03]  CL/F = 0.0184 [837] Vc/F = 0.454 [8.62e+03] Vp/F = 424 [5.01] Q/F = 27.5 [5.7e+03] add = 0.225 prop = 0.419 AIC = 873 Run_time = 0.344 mins | ka = 0.401 [32.5]  CL/F = 1.29 [142] Vc/F = 276 [1.38] add = 0.16 prop = 0.349 AIC = 333 Run_time = 0.102 mins | ka = 0.383 [30.5]  CL/F = 1.01 [8.6e+03] Vc/F = 262 [1.75] Vp/F = 188 [26.4] Q/F = 0.0512 [109] add = 0.162 prop = 0.315 AIC = 338 Run_time = 0.157 mins |
| cefaclor | CL = 3.35e+03 [143] Vc/F = 508 [1.36e+03] ka = 0.721 [6.37e+03] add = 0.001 prop = 144 AIC = 1339 Run_time = 0.284 mins | ka = 253 [285]  CL/F = 9.99 [32.9] Vc/F = 0.216 [430] Vp/F = 5.66 [89.2] Q = 7.07 [107] add = 0.001 prop = 0.497 AIC = 1083 Run_time = 0.958 mins | ka = 1.51 [122]  CL/F = 30.9 [1.88] Vc/F = 23.1 [14.2] add = 0.001 prop = 0.448 AIC = 690 Run_time = 0.154 mins | ka = 1.44 [138]  CL/F = 30 [8.53] Vc/F = 21.9 [16.5] Vp/F = 4.6e+03 [2.08e+03] Q/F = 0.881 [7.5e+03] add = 0.001 prop = 0.45 AIC = 707 Run_time = 0.245 mins |
| ceftriaxone | CL/F = 225 [3.78e+03] Vc/F = 252 [1.84e+04] add = 55.2 prop = 447 AIC = 1475 Run_time = 0.0379 mins | CL/F = 290 [9.94e+06] Vc/F = 0.553 [3.48e+07] Vp/F = 0.364 [1.34e+07] Q/F = 0.0855 [2.46e+07] add = 51.2 prop = 3.36e+06 AIC = 11011 Run_time = 0.0915 mins | CL/F = 0.319 [22.6] Vc/F = 1.49 [48.7] add = 40.8 prop = 0.439 AIC = 724 Run_time = 0.034 mins | CL/F = 0.416 [110] Vc/F = 1.03 [2.05e+04] Vp/F = 0.433 [2.03e+03] Q/F = 3.89 [8.29e+03] add = 48.8 prop = 0.471 AIC = 732 Run_time = 0.0794 mins |
| cephalexin | ka = 0.869 [51]  CL/F = 16.2 [1.36] Vc/F = 8.16 [8.54] add = 0.001 prop = 0.425 AIC = 968 Run_time = 0.153 mins | ka = 814 [229]  CL/F = 7.79 [31.3] Vc/F = 0.0134 [210] Vp/F = 6.73 [67.5] Q/F = 11.2 [91.5] add = 0.001 prop = 0.45 AIC = 1320 Run_time = 1.16 mins | ka = 1.97 [27]  CL/F = 16.4 [1.25] Vc/F = 19.1 [2.82] add = 0.001 prop = 0.435 AIC = 1017 Run_time = 0.166 mins | ka = 1.63 [56.7]  CL/F = 14.6 [2.15] Vc/F = 15.7 [7.13] Vp/F = 125 [17.8] Q/F = 2.43 [41.8] add = 0.001 prop = 0.419 AIC = 1004 Run_time = 0.243 mins |
| diazepam | CL = 4.2 [13.7] Vc = 27.7 [3.16] add = 0.0311 prop = 0.338 AIC = -256 Run_time = 0.0293 mins | CL = 2.44 [17.7] Vc = 15.6 [6.53] Vp = 27.1 [7.24] Q = 10.4 [9.28] add = 0.0065 prop = 0.191 AIC = -419 Run_time = 0.0439 mins | CL = 4.22 [13.7] Vc = 27.5 [3.17] add = 0.0316 prop = 0.335 AIC = -253 Run_time = 0.0287 mins | CL = 2.42 [18.2] Vc = 15.8 [6.4] Vp = 27.3 [7.2] Q = 10.1 [9.76] add = 0.0068 prop = 0.192 AIC = -409 Run_time = 0.0438 mins |
| fluorouracil | CL = 64.2 [3.17] Vc = 11.8 [6.58] add = 0.229 prop = 0.339 AIC = 351 Run_time = 0.0293 mins | CL = 38.3 [2.59] Vc = 1.74 [83.5] Vp = 2.13 [25.5] Q = 18.3 [9.81] add = 0.269 prop = 0.302 AIC = 320 Run_time = 0.0497 mins | CL = 64.1 [3.11] Vc = 11.7 [6.48] add = 0.239 prop = 0.343 AIC = 356 Run_time = 0.0272 mins | CL = 43.5 [14.1] Vc = 10.2 [6.24] Vp = 148 [52.3] Q = 17.8 [42.7] add = 0.0892 prop = 0.376 AIC = 356 Run_time = 0.0377 mins |
| oxprenolol (iv) | CL = 24.5 [1.69] Vc = 43.2 [0.899] add = 9.13 prop = 0.164 AIC = 1673 Run_time = 0.0284 mins | CL = 12.6 [2.7] Vc = 1.49 [42.6] Vp = 13 [4.99] Q = 10 [7.67] add = 0.0232 prop = 0.389 AIC = 1712 Run_time = 0.0531 mins | CL = 24.5 [1.69] Vc = 43.2 [0.899] add = 9.18 prop = 0.163 AIC = 986 Run_time = 0.0279 mins | CL = 23 [1.52] Vc = 33.1 [0.867] Vp = 19.1 [4.66] Q = 20 [6.62] add = 3.07 prop = 0.0792 AIC = 844 Run_time = 0.0411 mins |
| oxprenolol (oral) | ka = 0.437 [5.28]  CL/F = 58.8 [1.53] Vc/F = 24.6 [5.2] add = 0.142 prop = 0.34 AIC = 2190 Run_time = 0.0456 mins | ka = 66.8 [463]  CL = 11.8 [32.8] Vc/F = 0.0632 [433] Vp/F = 6.54 [86.1] Q/F = 3.18 [158] add = 0.0113 prop = 0.39 AIC = 2292 Run_time = 0.11 mins | ka = 2.11 [21]  CL = 61.3 [1.5] Vc = 132 [1.76] add = 6.29 prop = 0.368 AIC = 2275 Run_time = 0.0478 mins | ka = 1.6 [47.1]  CL/F = 56.5 [2.08] Vc/F = 100 [3.38] Vp/F = 46.6 [19.5] Q/F = 13.1 [13.4] add = 0.0737 prop = 0.331 AIC = 2321 Run_time = 0.0713 mins |
| pindolol | ka = 1.32 [110]  CL/F = 24.7 [4.5] Vc/F = 106 [2.38] add = 1.44 prop = 0.223 AIC = 651 Run_time = 0.0412 mins | ka = 58.6 [1.18e+03]  CL/F = 6.78 [36.5] Vc/F = 0.203 [853] Vp/F = 11.8 [52.2] Q/F = 2.78 [153] add = 0.775 prop = 0.339 AIC = 643 Run_time = 0.0655 mins | ka = 1.37 [95.3]  CL/F = 24.6 [4.46] Vc/F = 109 [2.46] add = 1.38 prop = 0.225 AIC = 668 Run_time = 0.0404 mins | ka = 1.32 [145]  CL/F = 24.5 [4.52] Vc/F = 108 [5.64] Vp/F = 1.13 [1.2e+04] Q/F = 0.463 [4.18e+03] add = 1.4 prop = 0.224 AIC = 680 Run_time = 0.0568 mins |
| tobramycin | CL = 3.89 [4.52] Vc/F = 25 [1.51] add = 0.001 prop = 0.259 AIC = 755 Run_time = 0.344 mins | CL = 29.8 [2.8e+03] Vc/F = 3.78 [7.98e+03] Vp/F = 5.9 [1.1e+04] Q/F = 0.795 [8.44e+04] add = 0.001 prop = 327 AIC = 1494 Run_time = 1.75 mins | CL = 3.9 [4.52] Vc/F = 25.2 [1.52] add = 0.001 prop = 0.259 AIC = 773 Run_time = 0.325 mins | CL = 3.75 [4.59] Vc/F = 20.5 [1.98] Vp/F = 7.72 [9.76] Q/F = 0.883 [376] add = 0.001 prop = 0.249 AIC = 784 Run_time = 0.61 mins |

Abbreviations: 1cmpt_fo, a one-compartment model with first-order elimination (or first-order absorption and elimination in oral cases); 2cmpt_fo, a two-compartment model with first-order elimination (or first-order absorption and elimination in oral cases); Run_time: computational running time; CL, clearance; Vc, central volume of distribution; Vp, peripheral volume of distribution; Q, inter-compartmental clearance; ka, absorption constant rate; add, additive residual error; prop, proportional residual error

a. Parameter estimates are presented as typical population estimates with their corresponding relative standard errors (RSE%) indicated in brackets. Except for the pheno_sd case, where the unit of CL is L/h/kg and the unit of V is L/kg, the units of CL and V in all other cases are L/h and L, respectively.

**Reference**

1. Hagemeijer F (1975) Absorption, half-life, and toxicity of oral aprindine in patients with acute myocardial infarction. Eur J Clin Pharmacol 9:21–25. https://doi.org/10.1007/BF00613425

2. Korzeniowski OM, Scheld WM, Sande MA (1977) Comparative Pharmacology of Cefaclor and Cephalexin. Antimicrob Agents Chemother 12:157–162. https://doi.org/10.1128/aac.12.2.157

3. Martin E, Koup JR, Paravicini U, Stoeckel K (1984) Pharmacokinetics of ceftriaxone in neonates and infants with meningitis. J Pediatr 105:475–481. https://doi.org/10.1016/S0022-3476(84)80032-3

4. Ghoneim MM, Mewaldt SP, Ambre J (1975) Plasma Levels of Diazepam and Mood Ratings. Anesth Analg 54:173

5. Kaplan SA, Jack ML, Alexander K, Weinfeld RE (1973) Pharmacokinetic profile of diazepam in man following single intravenous and oral and chronic oral administrations. J Pharm Sci 62:1789–1796. https://doi.org/10.1002/jps.2600621111

6. MacMillan WE, Wolberg WH, Welling PG (1978) Pharmacokinetics of Fluorouracil in Humans1. Cancer Res 38:3479–3482

7. Phillips TA, Howell A, Grieve RJ, Welling PG (1980) Pharmacokinetics of oral and intravenous fluorouracil in humans. J Pharm Sci 69:1428–1431. https://doi.org/10.1002/jps.2600691220

8. Mason WD, Winer N (1976) Pharmacokinetics of oxprenolol in normal subjects. Clin Pharmacol Ther 20:401–412. https://doi.org/10.1002/cpt1976204401

9. Gugler R, Herold W, Dengler HJ (1974) Pharmacokinetics of pindolol in man. Eur J Clin Pharmacol 7:17–24. https://doi.org/10.1007/BF00614385

10. Aarons L, Vozeh S, Wenk M, et al (1989) Population pharmacokinetics of tobramycin. Br J Clin Pharmacol 28:305–314. https://doi.org/10.1111/j.1365-2125.1989.tb05431.x
